# Supplementary material for: A solid solution alloy current collector to stabilize zinc metal anodes
Source: Royal Society of Chemistry journal article supplement (doi:10.1039/d5cc00675a), 2025-01-01
Supplement: d5cc00675a1.pdf [file d5cc00675a1.pdf]

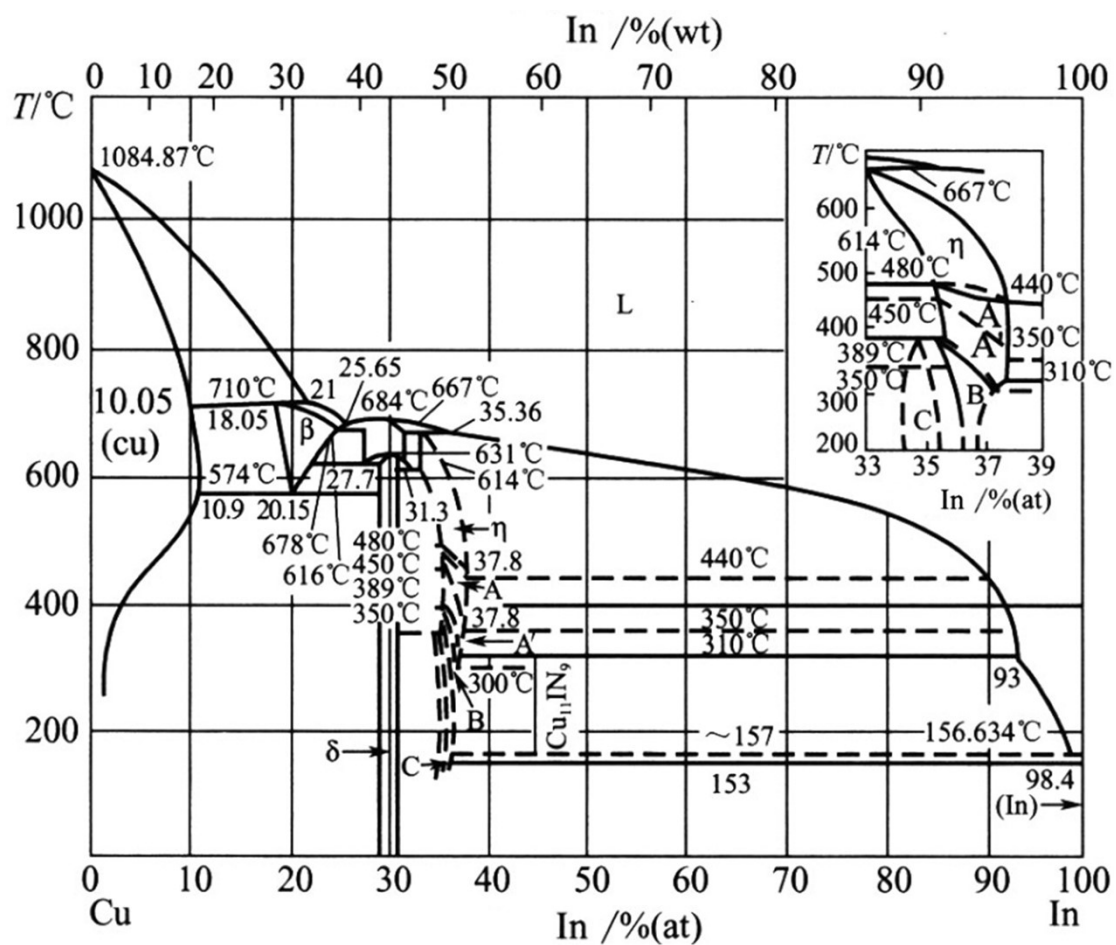

Fig. S1 Cu-In phase diagram.

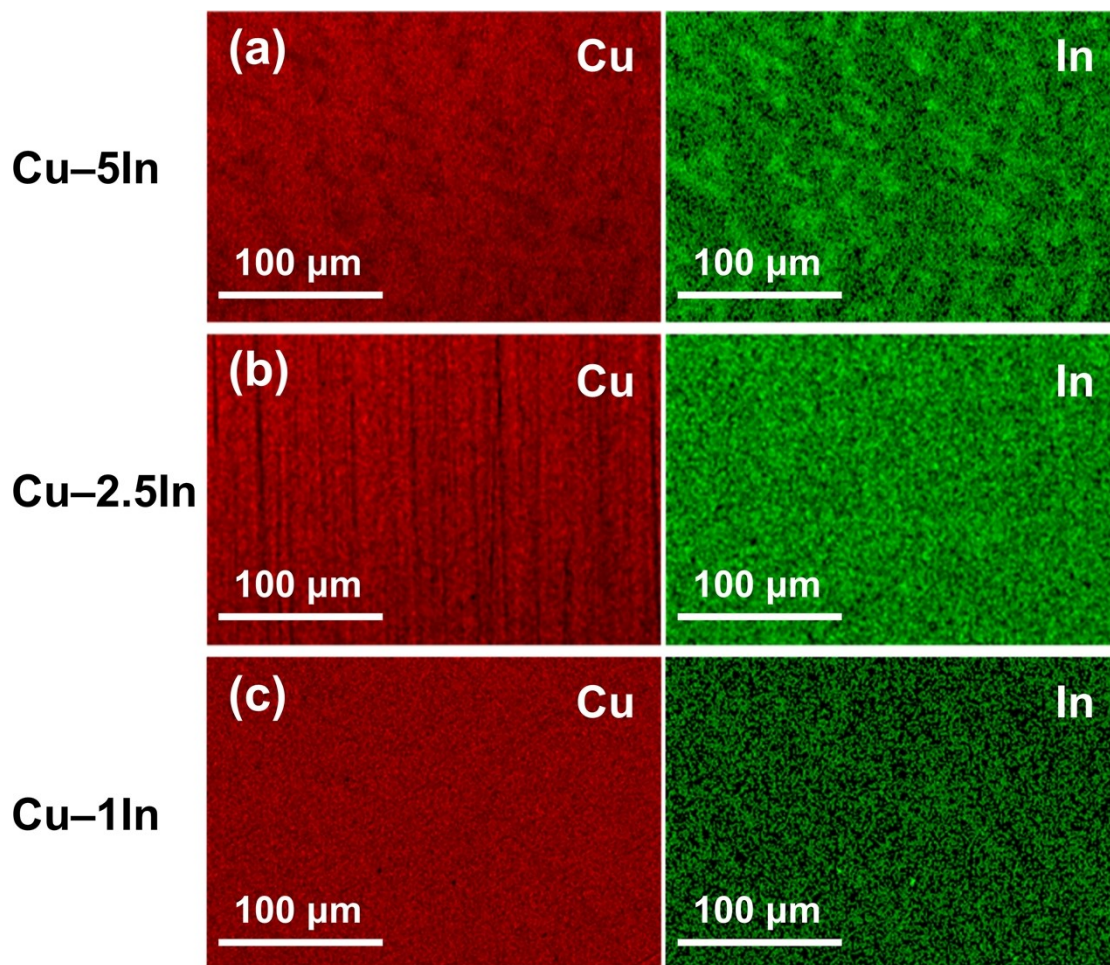

**Fig. S2** EDS mapping of three Cu-In alloy and pure Cu.

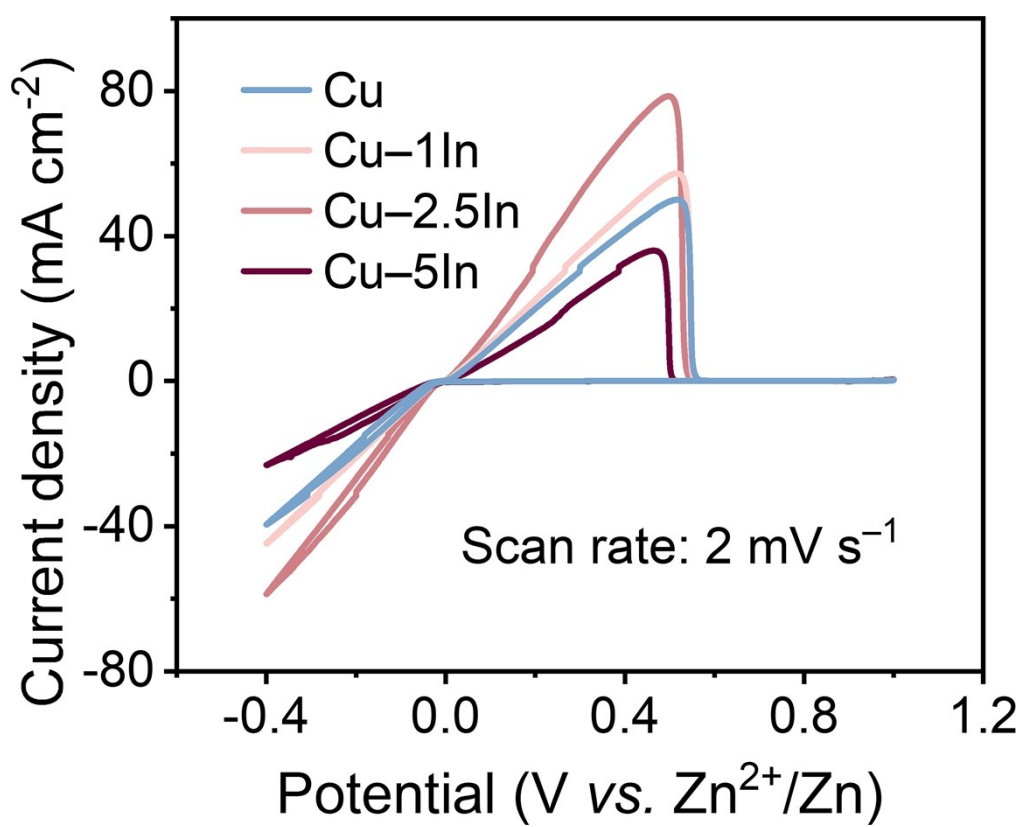

**Fig. S3** CV curves of asymmetric cells.

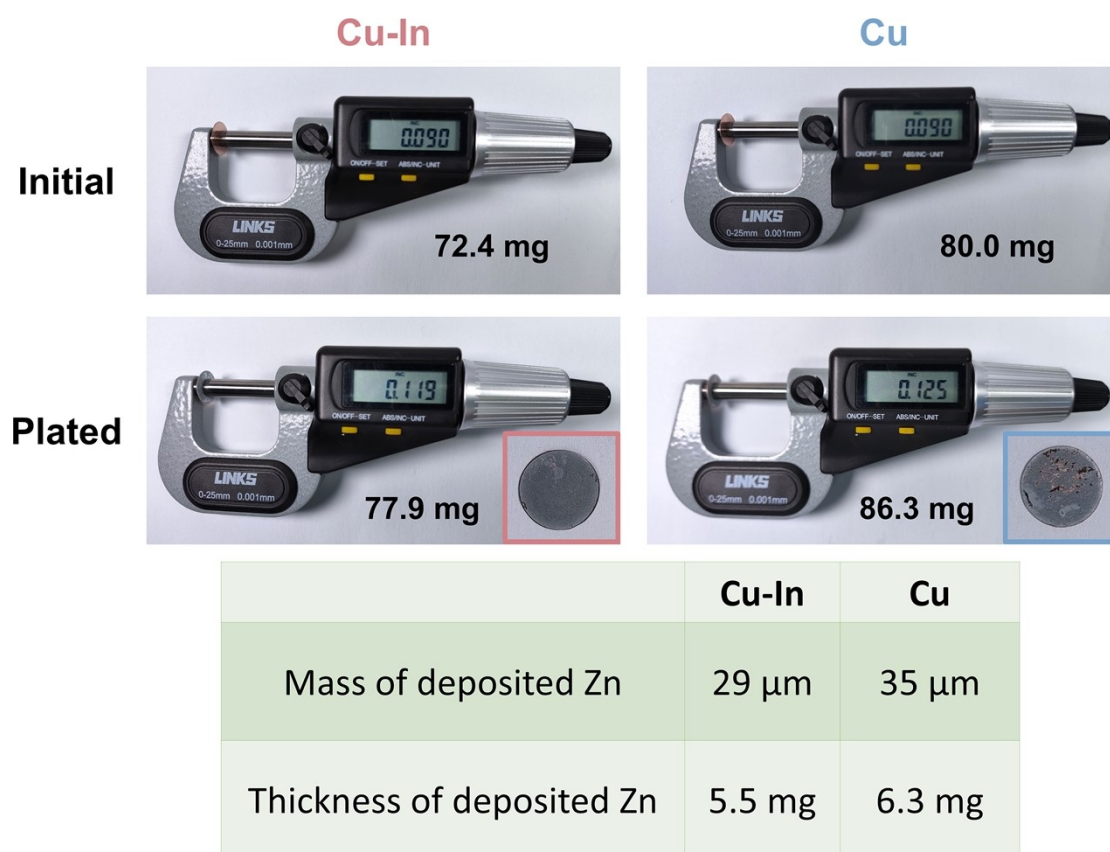

**Fig. S4** Details on the current collector before and after Zn pre-deposition.

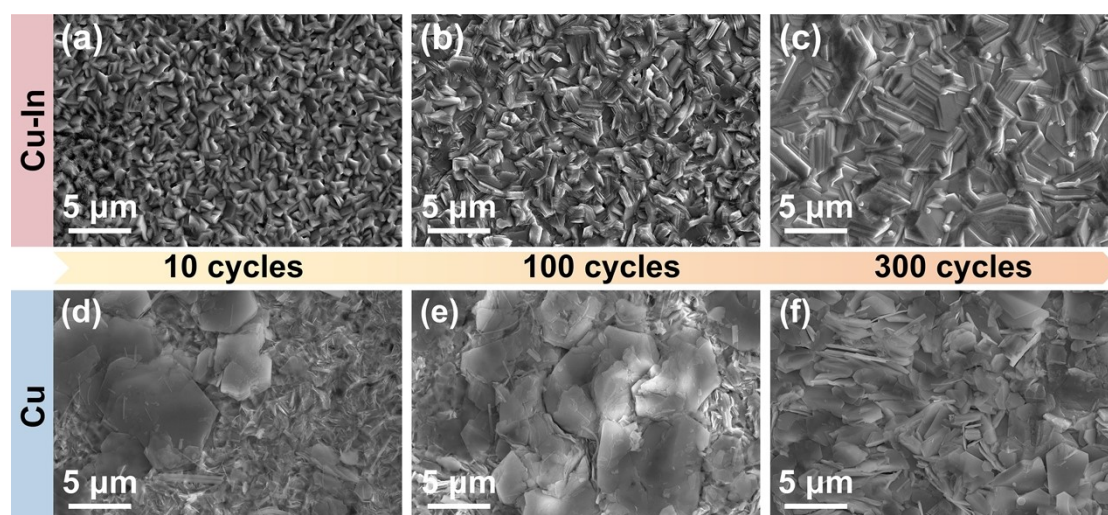

**Fig. S5** SEM images of the deposited Cu–In (a–c) and Cu (d–f) electrodes after cycling 10, 100, and 300 times in the asymmetric battery.

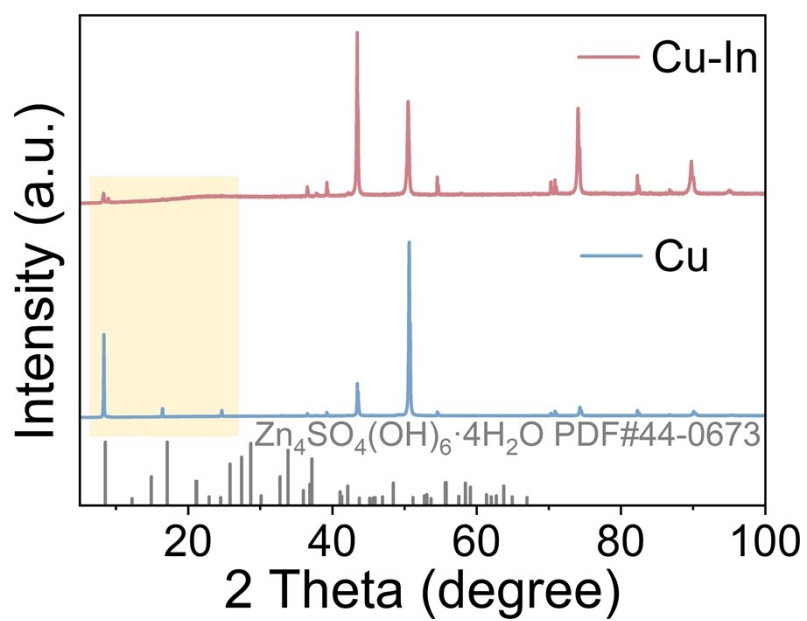

**Fig. S6** XRD patterns after cycling 10 cycles in the asymmetric battery.
